# Supplementary material for: Exemption of lattice collapse in Ni–MnO2 birnessite regulated by the structural water mobility
Source: Royal Society of Chemistry journal article supplement (doi:10.1039/d1ta06716h), 2021-01-01
Supplement: d1ta06716h1.pdf [file d1ta06716h1.pdf]

## Supporting Information

### Exemption of Lattice Collapse in Ni-MnO<sub>2</sub> Birnessite Regulated by the Structural Water Mobility

Xiaoqiang Shan,<sup>a</sup> Ranga Teja Pidathala,<sup>b</sup> SaeWon Kim,<sup>a</sup> Wenqian Xu,<sup>c</sup> Milinda Abeykoon,<sup>d</sup> Gihan Kwon,<sup>d</sup> Daniel Olds,<sup>d</sup> Badri Narayanan,<sup>b</sup> and Xiaowei Teng<sup>a\*</sup>

<sup>a</sup>Department of Chemical Engineering, University of New Hampshire, Durham, New Hampshire 03824, USA

<sup>b</sup>Department of Mechanical Engineering, University of Louisville, Louisville, Kentucky 40292, USA

<sup>c</sup>Advanced Photon Source, Argonne National Laboratory, Argonne, Illinois 60439, USA

<sup>d</sup>National Synchrotron Light Source II, Brookhaven National Laboratory, Upton, New York 11973, USA

## Experimental Sections

*Materials synthesis and characterizations:* (i) Synthesis of  $\text{MnO}_2$ ; NaOH was ground with 100 mg  $\text{Mn}_3\text{O}_4$  nanoparticles with the molar ratio of 2:1 using a mortar and pestle. The mixture was then heated in a tube furnace (Thermal Scientific, Inc.) in the open air at 270 °C for 6 hours. The obtained solids were thoroughly washed with DI  $\text{H}_2\text{O}$  and ethanol to remove NaOH residual and vacuum-dried, and then  $\text{MnO}_2$  birnessite was obtained. (ii) Synthesis of  $(\text{Ni})\text{MnO}_2$ ; 0.5198 g  $\text{MnCl}_4 \cdot 4\text{H}_2\text{O}$  (Alfa Aesar, 99% metals basis) and 0.2246 g  $\text{Ni}(\text{C}_5\text{H}_7\text{O}_2)_2$  (Alfa Aesar, 95% metal basis) were dissolved in 148.88 mL DI  $\text{H}_2\text{O}$  water with  $\text{Ni}^{2+}$  and  $\text{Mn}^{2+}$  atomic ratio 1:3. The solution was magnetically stirred under open-air, and KOH solution (Alfa Aesar, 99.98% metal basis) with a concentration of 0.173 g  $\text{mL}^{-1}$  was then injected with a rate of 0.167  $\text{mL min}^{-1}$  for 50 mins using a programmed syringe pump. The obtained precipitate was washed with DI water and ethanol, and then the product was dried and heated at 270 °C for 2 hours in open-air, and finally  $(\text{Ni})\text{MnO}_2$  birnessite was obtained. K-ion was chosen in the solution-phase synthesis of  $(\text{Ni})\text{MnO}_2$  because it has a smaller hydrated radius (Stokes radius) than Na- and Li-ions, and thus more K-ions could be pre-intercalated in final products. On the other hand, Na-ion was chosen to synthesize  $\text{MnO}_2$  birnessite because it has smaller ionic radius than K-ion in a state-state reaction. Notably, both materials were finally thermally treated at 270 °C to ensure the similar crystalline structure and structural water content before characterizations.

Transmission electron microscopy (TEM) images were collected on Zeiss/LEO 922 Omega TEM at the University of New Hampshire. X-ray diffraction was conducted at Beamline 17-BM-B at Advanced Photo Source at the Argonne National Laboratory with a wavelength  $\lambda=0.72768 \text{ \AA}$ , the X-ray scattering measurements were also conducted at 17-BM-B using a wavelength of 0.24116  $\text{\AA}$ , and the X-ray data were processed with GSAS II software and then analyzed by using PDFgui.<sup>1</sup>

*Electrochemical measurements:* Cyclic voltammetry (CV) and Chronopotentiometry (CP) measurements of  $\text{MnO}_2$  and  $(\text{Ni})\text{MnO}_2$  were conducted using a three-electrode half-cell powered by CHI 660d single-channel electrochemical workstation. A glassy carbon rotating disc electrode (Pine Instrument) was used as the working electrode, platinum wire and Ag/AgCl electrode as counter and reference electrodes, respectively. A mixture of 7 mg active material and 3 mg carbon black (Alfa Aesar, >99.9%) was ground and dispersed homogeneously into DI water with a concentration of 1 mg  $\text{mL}^{-1}$  by sonication. 10  $\mu\text{L}$  suspension containing 7  $\mu\text{g}$  active material and 3  $\mu\text{g}$  carbon black was drop cast onto glassy carbon electrode (0.5 cm in diameter) and vacuum dried. The electrochemical tests were conducted in the 250 mL flask containing 100 mL argon-purged  $\text{Na}_2\text{SO}_4$  (0.1 M) electrolyte. The CV tests were conducted with an applied potential window from -0.45 V to 1.25 V (vs Ag/AgCl) at the scan rate of 5, 50, 100 and 200  $\text{mV s}^{-1}$ . The CP tests were conducted at an applied voltage from -0.45 to 1.25 V (vs Ag/AgCl) at a current density of 1.0  $\text{A g}^{-1}$  and also for the same potential range at 2.0  $\text{A g}^{-1}$  for 20 cycles.

*Ex situ XAS measurements for electrochemical cell:* The *ex situ* X-ray absorption spectroscopy (XAS) measurements of  $\text{MnO}_2$  and  $(\text{Ni})\text{MnO}_2$  birnessite were conducted right after charging at Beamline 6-BM at NSLS-II Brookhaven National Laboratory. The electrodes were prepared by deposited the mixture of 90 % active material and 10 % carbon black on thin Tray carbon paper

and were cycled at  $5 \text{ mV s}^{-1}$  using CV and then charged to 1.25 V (vs Ag/AgCl) at  $0.5 \text{ mV s}^{-1}$  and afterward hold at 1.25 V for 10 minutes. The electrodes were washed with DI H<sub>2</sub>O to remove the salts. The dried electrode is sealed by Kapton tape and then characterized with XAS. The XAS data were analyzed by using ATHENA software.

*In situ XRD characterizations for electrochemical cell:* *In situ* XRD test of MnO<sub>2</sub> in a home-made electrochemical cell at beamline 17-BM-B using a wavelength of 0.72768 Å and *in situ* XRD test of (Ni)MnO<sub>2</sub> were conducted in a similar cell at beamline 28-ID-1 at Brookhaven National Laboratory with a wavelength of 0.166 Å. The mixture of 90 % active material and 10 % carbon black was deposited on the thin carbon paper and dried naturally in an open-air as the working electrode. The platinum wire and micro Ag/AgCl electrode as counter and reference electrode, respectively, and 0.5 M Na<sub>2</sub>SO<sub>4</sub> electrolyte was used as electrolyte. Electrochemical CV testing was applied at a scan rate of  $1 \text{ mV s}^{-1}$  for 2 cycles, and the XRD was collected during the CV scans. *In situ* XRD results were analyzed by using GSAS II software.

*First-principles calculations:* All the first-principles calculations were performed within the framework of Hubbard-corrected density functional theory (DFT+*U*) using the projected-augmented plane wave method as implemented in Vienna *Ab initio* Simulation Package (VASP).<sup>2-3</sup> We described the exchange correlations using the Perdew–Burke–Ernzerhof (PBE) functionals<sup>4</sup> within the generalized gradient approximation using the pseudopotentials supplied by VASP: Mn\_pv (valence:  $3d^5 4s^2$ ), O (valence:  $2s^2 2p^4$ ), Na\_pv (valence:  $3s^1$ ), H (valence:  $1s^1$ ) and Ni\_pv (valence:  $3d^8 4s^2$ ). Hubbard correction was employed to treat electron localization on Ni and Mn atoms using a rotationally-invariant form of DFT + *U* formulated by Liechtenstein *et al.*<sup>5</sup> with  $U = 4.6 \text{ eV}$  and  $J = 0.6 \text{ eV}$  following previous works on birnessite.<sup>6</sup> The computational supercell consisted of  $3 \times 1 \times 1$  unit cells of layered  $\delta$ -MnO<sub>2</sub> with one Na and 9 H<sub>2</sub>O molecules in the interlayer region (resulting in NaMn<sub>6</sub>O<sub>12</sub>.9H<sub>2</sub>O). Note that birnessite can contain up to 3 Na for this composition;<sup>7</sup> we used only one Na to simulate the Na-lean conditions typically encountered during deep charge. We employed a plane wave energy cutoff of 540eV and  $4 \times 3 \times 2$  Monkhorst-Pack grid to sample the Brillouin zone. All the atomic coordinates, including the lattice parameters, were relaxed in MnO<sub>2</sub> and (Ni)MnO<sub>2</sub> using gaussian smearing with a smearing width of 0.05 eV until the force on each atom was lower than  $0.005 \text{ eV/\AA}$ . The atomic charges were calculated using Bader analysis on the charge density grids for the relaxed structures.

*Classical molecular dynamics simulations:* All the classical molecular dynamics simulations were performed with a popular open-source package LAMMPS.<sup>8</sup> The computational supercell (dimensions:  $a = 70.6078 \text{ \AA}$ ,  $b = 13.4598 \text{ \AA}$ ,  $c = 33.1434 \text{ \AA}$ ,  $\alpha = 92.5^\circ$ ,  $\beta = 102.6^\circ$  and  $\gamma = 89.9^\circ$ ) consisted of  $12 \times 4 \times 4$  unit cells of layered  $\delta$ -MnO<sub>2</sub> with 64 Na, and 320 structural water in the interlayer region (resulting in Na<sub>64</sub>Mn<sub>384</sub>O<sub>768</sub>.320H<sub>2</sub>O). The initial configurations for different Ni locations were constructed by replicating the equilibrium structures derived from DFT along the periodic directions. We modeled the atomic interaction in the (Ni)MnO<sub>2</sub> birnessite lattice using a general force field, CLAYFF, developed by Cygan *et al.*<sup>9</sup> with Lennard Jones force-field parameters taken from earlier work by Newton and Kwon.<sup>10</sup> The structural water was described using SPC/E model,<sup>11</sup> and interactions involving Na<sup>+</sup> ions were accounted using Lennard-Jones potential.<sup>10</sup> The atomic charges were set at values obtained from Bader analysis of equilibrium structures derived from DFT. Long-range Coulombic interactions were accounted using the particle-meh Ewald method as implemented in LAMMPS. Previous CMD studies have shown that

this approach provides excellent description of structure, thermodynamics, ion-solvation behavior, and transport properties of MnO<sub>2</sub> birnessite.<sup>9, 12</sup>

CMD simulations were performed within the isobaric – isothermal ensemble (NPT) under ambient conditions for 5 ns, with a timestep of 0.5 fs. Constant pressure and temperature conditions were maintained using Nose-Hover thermostat/barostat. SHAKE algorithm<sup>13-14</sup> implemented within LAMMPS was used to constraint angles and bonds of the water molecules (as required for SPC/E model). Diffusivity of structural water and Na were calculated using the temporal evolution of mean-squared displacement of desired species averaged over last 4 ns of CMD trajectories.

## Supplementary Figures:

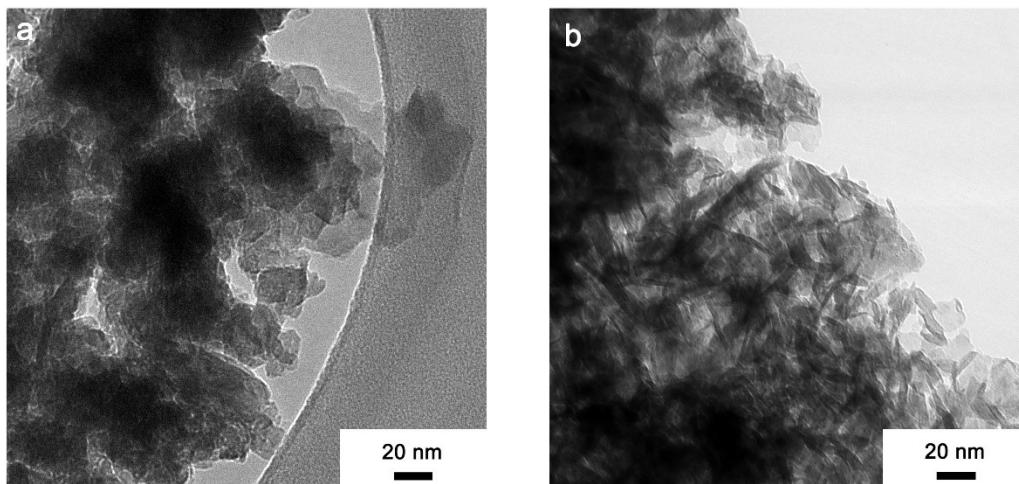

**Figure S1.** TEM images of (a) MnO<sub>2</sub> and (b) (Ni)MnO<sub>2</sub>.

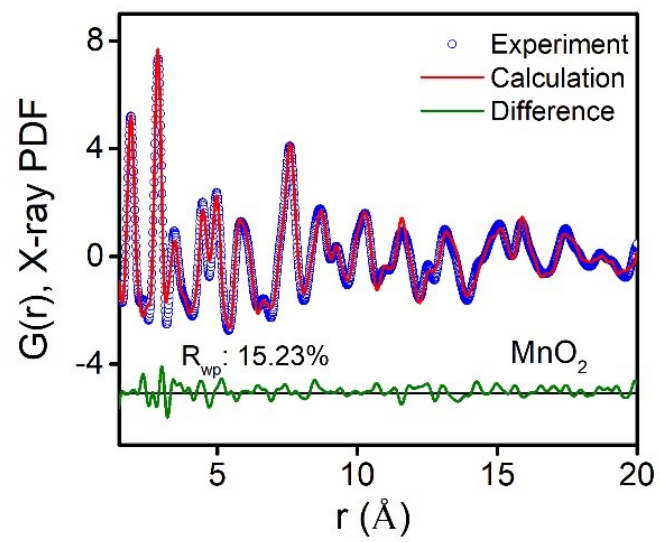

**Figure S2.** X-ray PDF analysis of MnO<sub>2</sub>.

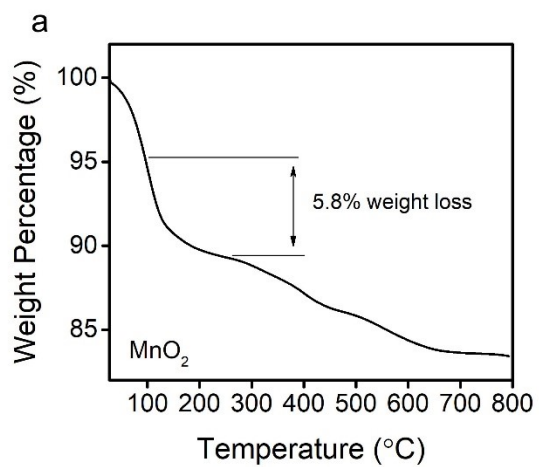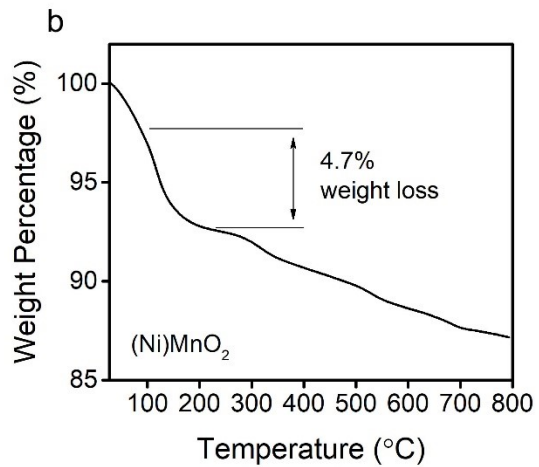

**Figure S3.** TGA of MnO<sub>2</sub> and (Ni)MnO<sub>2</sub>.

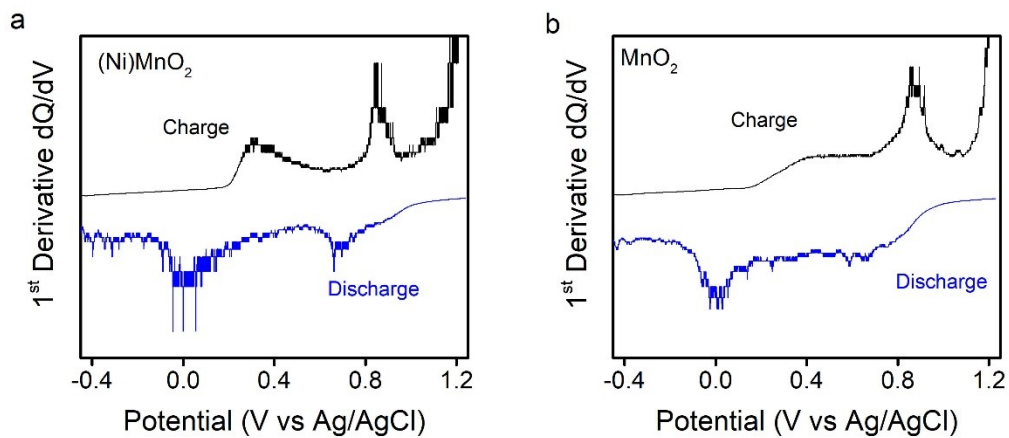

**Figure S4:** The  $dQ/dV$  (1<sup>st</sup> order derivative of charge with respect to potential) plots obtained from CP measurements of (a) (Ni)MnO<sub>2</sub> and (b) MnO<sub>2</sub> materials.



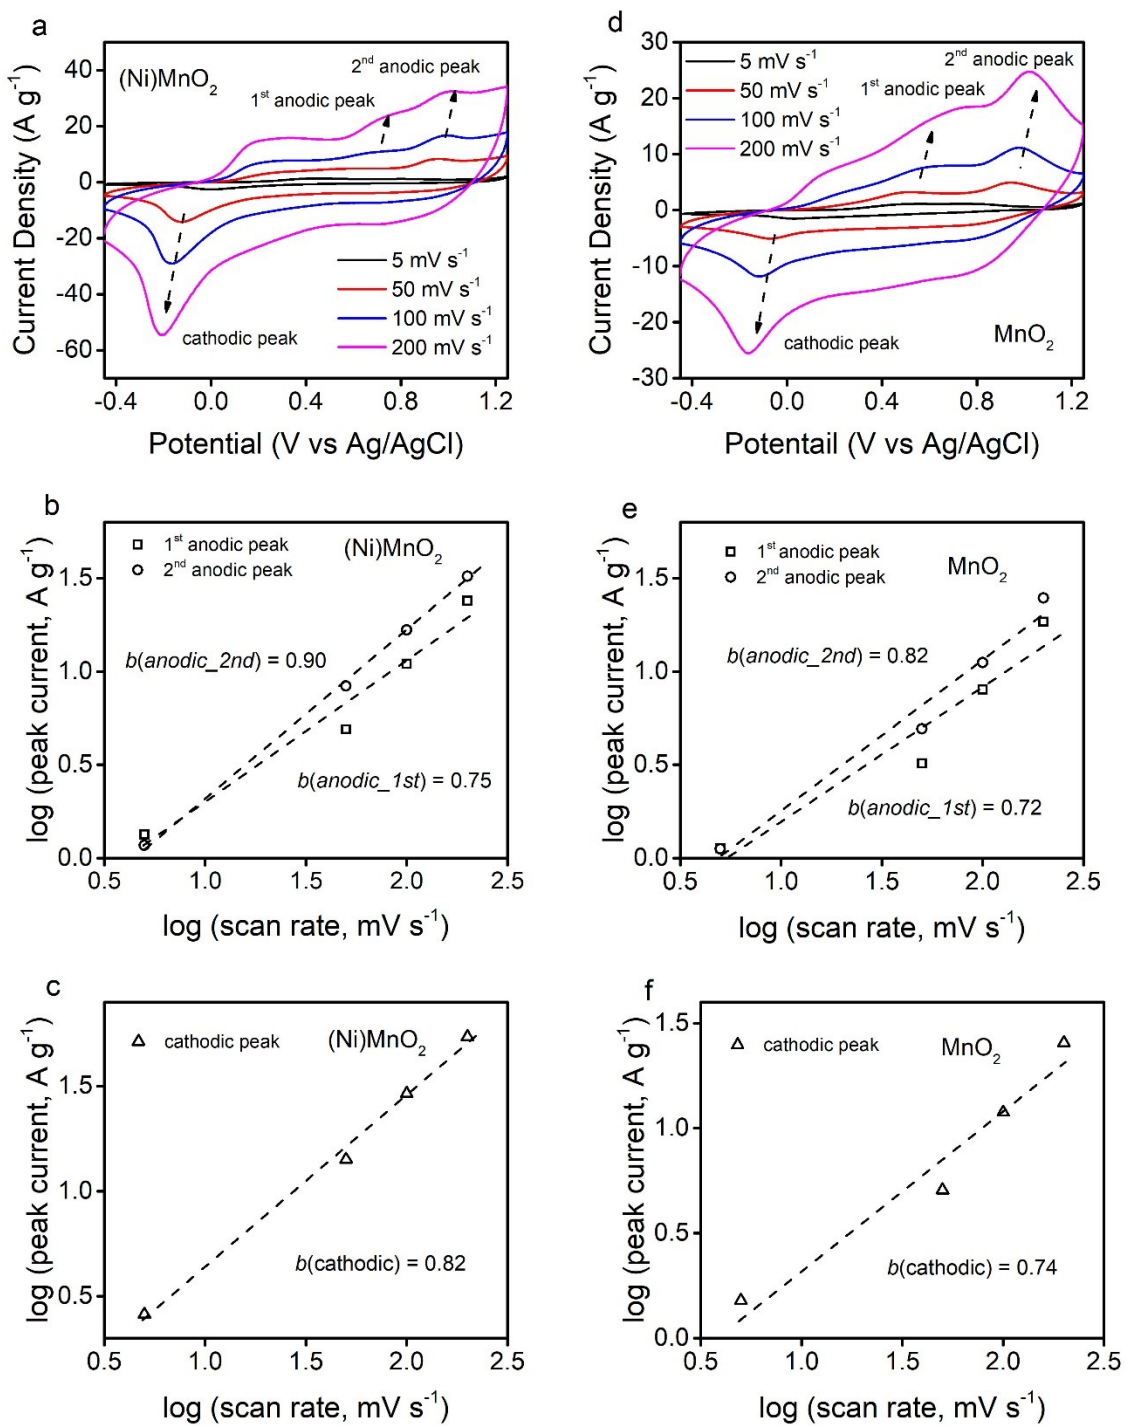

**Figure S5.** (a,d) CVs of (Ni)MnO<sub>2</sub> and MnO<sub>2</sub> at the scan rates from 5 to 200 mV s<sup>-1</sup>; (b,e) *b*-values of anodic peaks; (c,f) *b*-values of cathodic peaks.

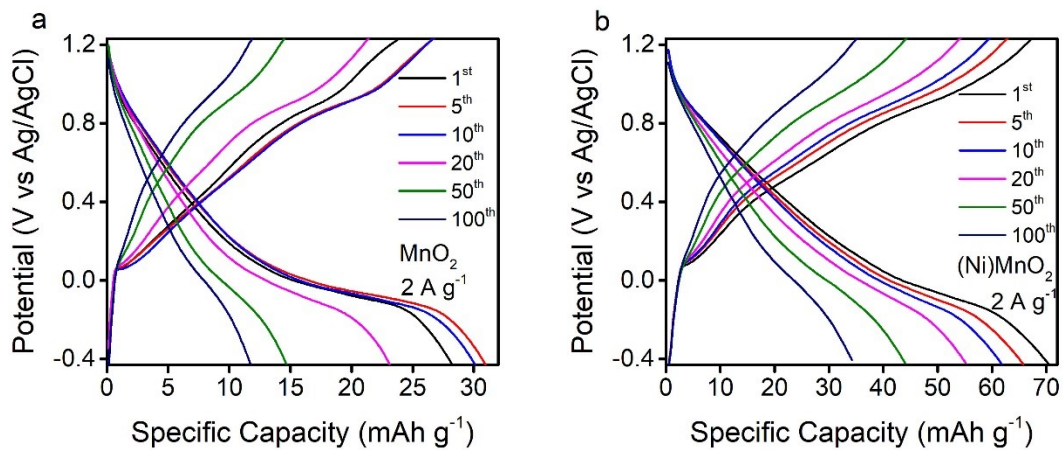

**Figure S6.** Charge and discharge profiles of MnO<sub>2</sub> and (Ni)MnO<sub>2</sub> at 2 A g<sup>-1</sup> with plotted 1<sup>st</sup>, 5<sup>th</sup>, 10<sup>th</sup>, 20<sup>th</sup>, 50<sup>th</sup>, and 100<sup>th</sup> cycles.

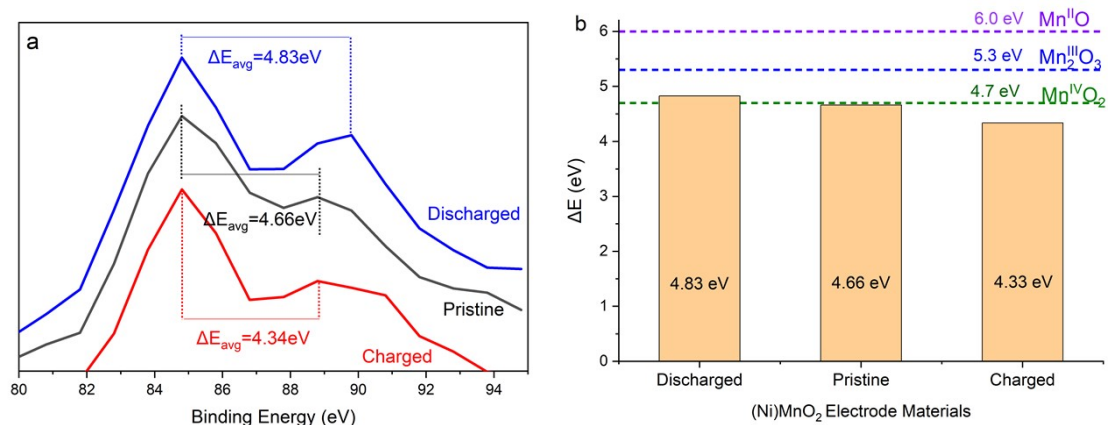

**Figure S7** (a) XPS Mn 3s spectra of pristine, discharged (-0.45 V vs. Ag/AgCl), and charged (1.25 V vs. Ag/AgCl) (Ni)MnO<sub>2</sub> electrode materials; (b) Mn 3s multiplet split of (Ni)MnO<sub>2</sub> in different electrochemical states, in comparison with the split from MnO, Mn<sub>2</sub>O<sub>3</sub>, MnO<sub>2</sub> standards.

## Supplementary Tables:

### Refined crystal structural parameters of MnO<sub>2</sub>

| Atom | Type | x     | y     | z     | Occ.  | Site | U <sub>iso</sub> | U <sub>11</sub> | U <sub>22</sub> | U <sub>33</sub> | U <sub>13</sub> |
|------|------|-------|-------|-------|-------|------|------------------|-----------------|-----------------|-----------------|-----------------|
| Mn1  | Mn+4 | 0     | 0     | 0     | 1.00  | 1a   | 0.05             | 0.012           | 0.010           | 0.122           | 0.005           |
| Mn2  | Mn+4 | 0.500 | 0.500 | 0     | 1.00  | 1e   | 0.05             | 0.012           | 0.010           | 0.122           | 0.005           |
| O1   | O-2  | 0.620 | 0.001 | 0.863 | 1.00  | 2i   | 0.03             | 0.044           | 0.008           | 0.025           | 0.006           |
| O2   | O-2  | 0.120 | 0.501 | 0.863 | 1.00  | 2i   | 0.03             | 0.044           | 0.008           | 0.025           | 0.006           |
| Na1  | Na+1 | 0.452 | 0.803 | 0.467 | 0.145 | 2i   | 0.13             | 0.025           | 0.020           | 0.366           | 0.044           |
| Na1  | Na+1 | 0.952 | 0.303 | 0.467 | 0.145 | 2i   | 0.13             | 0.025           | 0.020           | 0.336           | 0.044           |
| O3   | O-2  | 0.452 | 0.803 | 0.467 | 0.478 | 2i   | 0.13             | 0.025           | 0.020           | 0.336           | 0.044           |
| O4   | O-2  | 0.952 | 0.303 | 0.467 | 0.478 | 2i   | 0.13             | 0.025           | 0.020           | 0.336           | 0.044           |

Space group: P-1

a=5.044 b=2.868 c=7.281(Å) α=88.848 β=100.119 γ=88.969 (°)

**Table S1.** Refined crystal structural parameters of MnO<sub>2</sub> material with X-ray PDF fitting up to 20 Å with R<sub>wp</sub>=15.23%. The sodium and water amount were determined from EDXS and TGA measurements.

**Refined crystal structural parameters of (Ni)MnO<sub>2</sub>**

| Atom | Type | x     | y | z     | Occ. | Site | U <sub>iso</sub> | U <sub>11</sub> | U <sub>22</sub> | U <sub>33</sub> | U <sub>13</sub> |
|------|------|-------|---|-------|------|------|------------------|-----------------|-----------------|-----------------|-----------------|
| Mn1  | Mn+4 | 0     | 0 | 0     | 0.77 | 2a   | 0.04             | 0.004           | 0.010           | 0.108           | 0.013           |
| Ni1  | Ni+2 | 0     | 0 | 0     | 0.23 | 2a   | 0.14             | 0.005           | 0.013           | 0.393           | 0.023           |
| O1   | O-2  | 0.343 | 0 | 0.148 | 1.00 | 4i   | 0.01             | 0.013           | 0.006           | 0.004           | 0.008           |
| O2   | O-2  | 0.380 | 0 | 0.443 | 0.66 | 4i   | 0.07             | 0.007           | 0.187           | 0.001           | 0.004           |
| K1   | K+1  | 0.380 | 0 | 0.442 | 0.06 | 4i   | 0.07             | 0.007           | 0.187           | 0.001           | 0.004           |
| O3   | O-2  | 0     | 0 | 0.500 | 0.20 | 2c   | 0.02             | 0.008           | 0.063           | 0.018           | 0.057           |

Space group: C 2/m

a=4.954 b=2.896 c=7.069 (Å)  $\alpha=90$   $\beta=95.665$   $\gamma=90$  (°)

**Table S2.** Refined crystal structural parameters of (Ni)MnO<sub>2</sub> material with X-ray PDF fitting up to 15 Å with R<sub>wp</sub>=20.33%. The potassium and water amount were determined from EDXS and TGA measurements.

| Number | Electrode Materials                                                                        | Capacity (mAh g <sup>-1</sup> ) | Retention (cycles)              | Reference |
|--------|--------------------------------------------------------------------------------------------|---------------------------------|---------------------------------|-----------|
| 1      | $\delta$ -(Ni)MnO <sub>2</sub>                                                             | 96 @1Ag <sup>-1</sup>           | 49.6% (100) @2Ag <sup>-1</sup>  | Our work  |
| 2      | $\delta$ -MnO <sub>2</sub>                                                                 | 47 @1Ag <sup>-1</sup>           | 41.7% (100) @2Ag <sup>-1</sup>  | Our work  |
| 3      | $\delta$ -H-MnO <sub>2</sub>                                                               | ~90 @ 2C                        | ~66% (500) @2C                  | Ref. 15   |
| 4      | Al <sub>0.05</sub> Mn <sub>0.95</sub> O <sub>2</sub>                                       | 20 @ 0.2Ag <sup>-1</sup>        | 74% (500) @ 0.2Ag <sup>-1</sup> | Ref. 16   |
| 5      | Na <sub>0.75</sub> Ni <sub>0.82</sub> Co <sub>0.12</sub> Mn <sub>0.06</sub> O <sub>2</sub> | 80 @1C                          | 65% (300) @1C                   | Ref. 17   |

**Table S3:** The comparison of electrochemical performance between the reported MnO<sub>2</sub>-based electrode materials and the ones reported in this study.

| <b>Ni substituted at various<br/>Mn Octahedral sites</b> | <b>Energy (eV/atom)</b> | <b>Interplanar<br/>spacing (Å)</b> |
|----------------------------------------------------------|-------------------------|------------------------------------|
| MnO <sub>2</sub>                                         | -6.1195                 | 7.3703                             |
| (Ni)MnO <sub>2</sub> Site I                              | -5.9317                 | 7.3485                             |
| (Ni)MnO <sub>2</sub> Site II                             | -5.9319                 | 7.3478                             |
| (Ni)MnO <sub>2</sub> Site III                            | -5.9364                 | 7.3903                             |
| (Ni)MnO <sub>2</sub> Site IV                             | -5.9352                 | 7.3322                             |
| (Ni)MnO <sub>2</sub> Site V                              | -5.9483                 | 7.4833                             |
| (Ni)MnO <sub>2</sub> Site VI                             | -5.9348                 | 7.3274                             |

**Table S4:** Effect of location of Ni dopant on the cohesive energy (eV/atom) and interlayer spacing (Å) for Na<sub>0.17</sub>Ni<sub>0.17</sub>Mn<sub>0.83</sub>O<sub>2</sub>·0.8333H<sub>2</sub>O in the deep charging case. The location of Ni is marked by I to VI in Figure 4 of the main text.

## Reference:

1. Toby, B. H.; Von Dreele, R. B., GSAS-II: the genesis of a modern open-source all purpose crystallography software package. *Journal of Applied Crystallography* **2013**, *46* (2), 544-549.
2. Kresse, G.; Furthmüller, J., Efficient iterative schemes for ab initio total-energy calculations using a plane-wave basis set. *Physical Review B* **1996**, *54* (16), 11169-11186.
3. Kresse, G.; Joubert, D., From ultrasoft pseudopotentials to the projector augmented-wave method. *Physical Review B* **1999**, *59* (3), 1758-1775.
4. Perdew, J. P.; Burke, K.; Ernzerhof, M., Generalized Gradient Approximation Made Simple. *Physical review letters* **1996**, *77* (18), 3865-3868.
5. Liechtenstein, A. I.; Anisimov, V. I.; Zaanen, J., Density-functional theory and strong interactions: Orbital ordering in Mott-Hubbard insulators. *Physical Review B* **1995**, *52* (8), R5467-R5470.
6. Tompsett, D. A.; Parker, S. C.; Islam, M. S., Surface properties of  $\alpha$ -MnO<sub>2</sub>: relevance to catalytic and supercapacitor behaviour. *Journal of Materials Chemistry A* **2014**, *2* (37), 15509-15518.
7. Lucht, K. P.; Mendoza-Cortes, J. L., Birnessite: A Layered Manganese Oxide To Capture Sunlight for Water-Splitting Catalysis. *The Journal of Physical Chemistry C* **2015**, *119* (40), 22838-22846.
8. Plimpton, S., Fast Parallel Algorithms for Short-Range Molecular Dynamics. *Journal of Computational Physics* **1995**, *117* (1), 1-19.
9. Cygan, R. T.; Liang, J.-J.; Kalinichev, A. G., Molecular Models of Hydroxide, Oxyhydroxide, and Clay Phases and the Development of a General Force Field. *The Journal of Physical Chemistry B* **2004**, *108* (4), 1255-1266.
10. Newton, A. G.; Kwon, K. D., Molecular simulations of hydrated phyllosulfates. *Geochimica et Cosmochimica Acta* **2018**, *235*, 208-223.
11. Berendsen, H. J. C.; Grigera, J. R.; Straatsma, T. P., The missing term in effective pair potentials. *The Journal of Physical Chemistry* **1987**, *91* (24), 6269-6271.
12. Cheng, W.; Lindholm, J.; Holmboe, M.; Luong, N. T.; Shchukarev, A.; Ilton, E. S.; Hanna, K.; Boily, J.-F., Nanoscale Hydration in Layered Manganese Oxides. *Langmuir* **2021**, *37* (2), 666-674.
13. Ryckaert, J.-P.; Ciccotti, G.; Berendsen, H. J. C., Numerical integration of the cartesian equations of motion of a system with constraints: molecular dynamics of n-alkanes. *Journal of Computational Physics* **1977**, *23* (3), 327-341.
14. Andersen, H. C., Rattle: A "velocity" version of the shake algorithm for molecular dynamics calculations. *Journal of Computational Physics* **1983**, *52* (1), 24-34.
15. Thapa, A. K.; Pandit, B.; Thapa, R.; Luitel, T.; Paudel, H. S.; Sumanasekera, G.; Sunkara, M. K.; Gunawardhana, N.; Ishihara, T.; Yoshio, M., Synthesis of mesoporous birnessite-MnO<sub>2</sub> composite as a cathode electrode for lithium battery. *Electrochimica Acta* **2014**, *116*, 188-193.
16. Li, Y.; Xie, H., Mechanochemical-synthesized Al-doped manganese dioxides for electrochemical supercapacitors. *Ionics* **2010**, *16* (1), 21-25.
17. Yang, J.; Tang, M.; Liu, H.; Chen, X.; Xu, Z.; Huang, J.; Su, Q.; Xia, Y., O<sub>3</sub>-Type Layered Ni-Rich Oxide: A High-Capacity and Superior-Rate Cathode for Sodium-Ion Batteries. *Small* **2019**, *15* (52), 1905311.
